# Supplementary material for: Huang-Pu-Tong-Qiao Formula Ameliorates the Hippocampus Apoptosis in Diabetic Cognitive Dysfunction Mice by Activating CREB/BDNF/TrkB Signaling Pathway
Source: Hindawi journal article supplement (doi:10.1155/2021/5514175), 2021-06-09
Supplement: f1 [file 5514175.f1.pdf]

Table S1 The levels of body weight and fasting plasma glucose at different time in CTRL group and DM group mice before DCD model

| Groups  | CTRL | weight | FBG | DM | weight | FBG  |
|---------|------|--------|-----|----|--------|------|
| 0weeks  | 1    | 21.5   | 4.3 | 1  | 21     | 4.6  |
|         | 2    | 21.6   | 3.9 | 2  | 23.4   | 4.5  |
|         | 3    | 23.5   | 5.3 | 3  | 20     | 6.7  |
|         | 4    | 21.4   | 6   | 4  | 21.7   | 4.5  |
|         | 5    | 20.5   | 4.6 | 5  | 20.9   | 4.2  |
|         | 6    | 22.2   | 6.1 | 6  | 21.5   | 4.5  |
| 2weeks  | 1    | 20.5   | 5.3 | 1  | 24.9   | 8.3  |
|         | 2    | 24.1   | 5.2 | 2  | 24.5   | 5.3  |
|         | 3    | 21.2   | 6.1 | 3  | 25.3   | 5.2  |
|         | 4    | 21.7   | 4.8 | 4  | 24.1   | 6.7  |
|         | 5    | 22.8   | 6.1 | 5  | 26     | 6.8  |
|         | 6    | 23.1   | 6.3 | 6  | 23.1   | 6.3  |
| 4weeks  | 1    | 20.4   | 4.3 | 1  | 25.3   | 9.4  |
|         | 2    | 23     | 5.3 | 2  | 25.3   | 12.8 |
|         | 3    | 22.2   | 5.1 | 3  | 26.2   | 14.3 |
|         | 4    | 23     | 6.9 | 4  | 25.6   | 9.4  |
|         | 5    | 23.8   | 4.9 | 5  | 26.8   | 6.4  |
|         | 6    | 23     | 5.6 | 6  | 24.3   | 10.8 |
| 6weeks  | 1    | 21     | 7   | 1  | 24.8   | 20   |
|         | 2    | 24.1   | 8.7 | 2  | 24     | 26.4 |
|         | 3    | 24.6   | 8.3 | 3  | 25.2   | 24.6 |
|         | 4    | 25.5   | 7   | 4  | 24     | 25.1 |
|         | 5    | 23.1   | 7.3 | 5  | 26.4   | 28.3 |
|         | 6    | 24.5   | 5.9 | 6  | 23.6   | 24.2 |
| 8weeks  | 1    | 22.6   | 6.4 | 1  | 25.4   | 23.1 |
|         | 2    | 25.8   | 4.8 | 2  | 24.4   | 29.8 |
|         | 3    | 25.49  | 6.8 | 3  | 26.1   | 33   |
|         | 4    | 24.7   | 6.2 | 4  | 24.7   | 29.5 |
|         | 5    | 24.7   | 3.8 | 5  | 26.6   | 30   |
|         | 6    | 25.3   | 6.3 | 6  | 24.1   | 23.6 |
| 10weeks | 1    | 24.5   | 6.4 | 1  | 26.7   | 23.1 |
|         | 2    | 27.1   | 5.8 | 2  | 25.7   | 26.8 |
|         | 3    | 26.6   | 6.8 | 3  | 26.9   | 33   |
|         | 4    | 26.5   | 7.2 | 4  | 25.9   | 29.5 |
|         | 5    | 26.3   | 4.8 | 5  | 26.7   | 30   |
|         | 6    | 26.6   | 6.3 | 6  | 24.5   | 23.6 |
| 12weeks | 1    | 25.4   | 7.7 | 1  | 26.3   | 26.1 |
|         | 2    | 28.9   | 9.1 | 2  | 24.6   | 29   |
|         | 3    | 27.7   | 8.3 | 3  | 25.5   | 30   |
|         | 4    | 27.4   | 9   | 4  | 28.9   | 20.2 |
|         | 5    | 26.7   | 6.8 | 5  | 24.4   | 25.8 |
|         | 6    | 27     | 9.5 | 6  | 27.9   | 30.3 |

Table S2 The results of water maze test at different time in CTRL group and DM group mice before DCD model establishment

| Groups  | CTRL | Escape latency (s) | Crossing times of the target platform (n) | DM | Escape latency (s) | Crossing times of the target platform (n) |
|---------|------|--------------------|-------------------------------------------|----|--------------------|-------------------------------------------|
| 0weeks  | 1    | 22.86              | 3.5                                       | 1  | 24.42              | 3.5                                       |
|         | 2    | 21.72              | 4                                         | 2  | 26.52              | 4.5                                       |
|         | 3    | 26.1               | 7.5                                       | 3  | 30.26              | 5                                         |
|         | 4    | 28.12              | 4                                         | 4  | 16.26              | 4                                         |
|         | 5    | 23.5               | 3.5                                       | 5  | 19.26              | 3.5                                       |
|         | 6    | 19.3               | 5                                         | 6  | 18.82              | 5                                         |
| 4weeks  | 1    | 22.78              | 5                                         | 1  | 15.02              | 7                                         |
|         | 2    | 25.18              | 6                                         | 2  | 21.42              | 6                                         |
|         | 3    | 16.38              | 8                                         | 3  | 22.46              | 9                                         |
|         | 4    | 18.06              | 9                                         | 4  | 16.38              | 6                                         |
|         | 5    | 20.22              | 10                                        | 5  | 20.38              | 9                                         |
|         | 6    | 17.34              | 7                                         | 6  | 20.14              | 10                                        |
| 8weeks  | 1    | 24.06              | 11                                        | 1  | 21.86              | 6                                         |
|         | 2    | 14.46              | 4                                         | 2  | 21.42              | 7                                         |
|         | 3    | 14.94              | 5                                         | 3  | 23.58              | 6                                         |
|         | 4    | 16.62              | 7                                         | 4  | 22.86              | 8                                         |
|         | 5    | 14.94              | 3                                         | 5  | 21.5               | 6                                         |
|         | 6    | 22.86              | 6                                         | 6  | 27.42              | 5                                         |
| 12weeks | 1    | 21.16              | 3                                         | 1  | 28.8               | 5                                         |
|         | 2    | 15.44              | 7                                         | 2  | 28.36              | 4                                         |
|         | 3    | 6.2                | 4                                         | 3  | 37.56              | 3                                         |
|         | 4    | 16.28              | 5                                         | 4  | 27.32              | 1                                         |
|         | 5    | 18.92              | 6                                         | 5  | 35.56              | 2                                         |
|         | 6    | 25.48              | 8                                         | 6  | 31.8               | 2                                         |

Table S3 Effect of HPTQ on the level of weight and blood glucose in DCD mice

| Groups | CTRL | weight | FBG | DM | weight | FBG  | HPTQ | weight | FBG  |
|--------|------|--------|-----|----|--------|------|------|--------|------|
| 1week  | 1    | 25.4   | 7.7 | 1  | 26.3   | 26.1 | 1    | 29.5   | 29.2 |
|        | 2    | 28.9   | 9.1 | 2  | 24.6   | 29   | 2    | 27.6   | 30.1 |
|        | 3    | 27.7   | 8.3 | 3  | 25.5   | 30   | 3    | 24.1   | 23.4 |
|        | 4    | 27.4   | 9   | 4  | 28.9   | 20.2 | 4    | 22.6   | 25.1 |
|        | 5    | 26.7   | 6.8 | 5  | 24.4   | 25.8 | 5    | 22.2   | 27.7 |
|        | 6    | 27     | 9.5 | 6  | 27.9   | 30.3 | 6    | 26.7   | 22.8 |
| 2weeks | 1    | 25.4   | 7.7 | 1  | 29.9   | 22.1 | 1    | 25.3   | 30   |
|        | 2    | 28.9   | 7.1 | 2  | 26.4   | 29   | 2    | 30.3   | 29.5 |
|        | 3    | 29.7   | 8.3 | 3  | 25.8   | 32   | 3    | 26.5   | 25.3 |
|        | 4    | 27.4   | 3   | 4  | 22.5   | 30   | 4    | 25.3   | 25.8 |
|        | 5    | 30.7   | 9.8 | 5  | 29.2   | 25.8 | 5    | 22.1   | 22.2 |
|        | 6    | 27     | 5.5 | 6  | 24.2   | 25.3 | 6    | 27.1   | 19.9 |
| 3weeks | 1    | 27.4   | 5.1 | 1  | 30.8   | 28.4 | 1    | 29     | 29.2 |
|        | 2    | 28.9   | 2.1 | 2  | 29.2   | 20.5 | 2    | 30.6   | 28.7 |
|        | 3    | 29.7   | 5.5 | 3  | 22.4   | 30   | 3    | 25.3   | 21.9 |
|        | 4    | 27.4   | 6.2 | 4  | 22.8   | 33.3 | 4    | 20.2   | 19.4 |
|        | 5    | 26.7   | 4.7 | 5  | 27.9   | 27.1 | 5    | 20.2   | 18.7 |
|        | 6    | 27     | 9.6 | 6  | 25.2   | 33   | 6    | 24.9   | 19.8 |
| 4weeks | 1    | 28     | 4.9 | 1  | 29     | 30   | 1    | 22.7   | 19.4 |
|        | 2    | 29.6   | 7.1 | 2  | 25.4   | 33   | 2    | 30.7   | 29.4 |
|        | 3    | 29.9   | 9.4 | 3  | 25.1   | 20.5 | 3    | 20.2   | 25   |
|        | 4    | 27.6   | 3.6 | 4  | 28     | 33.3 | 4    | 22     | 24.4 |
|        | 5    | 26.5   | 6.7 | 5  | 24.5   | 27.2 | 5    | 25.9   | 16.1 |
|        | 6    | 27.3   | 8.1 | 6  | 28.1   | 30.9 | 6    | 25.8   | 14.3 |

Table S4 Effect of HPTQ on the learning and memory in DCD mice model tested by morris water maze

| CTRL | Escape latency (s) | Crossing times of the target platform (n) | DCD | Escape latency (s) | Crossing times of the target platform (n) | HPTQ | Escape latency (s) | Crossing times of the target platform (n) |
|------|--------------------|-------------------------------------------|-----|--------------------|-------------------------------------------|------|--------------------|-------------------------------------------|
| 1    | 5.44               | 3                                         | 1   | 85.24              | 1                                         | 1    | 49.24              | 4                                         |
| 2    | 34.84              | 7                                         | 2   | 69.24              | 0                                         | 2    | 35.64              | 1                                         |
| 3    | 18.44              | 4                                         | 3   | 51.64              | 0                                         | 3    | 32.04              | 2                                         |
| 4    | 24.44              | 5                                         | 4   | 29.64              | 1                                         | 4    | 65.24              | 3                                         |
| 5    | 15.64              | 6                                         | 5   | 68.84              | 2                                         | 5    | 23.32              | 4                                         |
| 6    | 21.24              | 4                                         | 6   | 53.24              | 2                                         | 6    | 36.44              | 2                                         |

Table S5 Effect of HPTQ on the learning and memory in DCD mice model tested by novel object recognition

| CTRL | Prefere<br>nce<br>Index | DCD | Prefere<br>nce<br>Index | HPT<br>Q | Prefere<br>nce<br>Index |
|------|-------------------------|-----|-------------------------|----------|-------------------------|
| 1    | 0.504                   | 1   | 0.2273                  | 1        | 0.1738                  |
| 2    | 0.468                   | 2   | 0.1629                  | 2        | 0.3674                  |
| 3    | 0.556                   | 3   | 0.1127                  | 3        | 0.3714                  |
| 4    | 0.494                   | 4   | 0.222                   | 4        | 0.3681                  |
| 5    | 0.652                   | 5   | 0.25                    | 5        | 0.2771                  |
| 6    | 0.625                   | 6   | -0.051                  | 6        | 0.4063                  |

Table S6 Effect of HPTQ on the level of insulin in DCD mice

| CTRL | insulin | DCD | insulin  | HPT<br>Q | insulin  |
|------|---------|-----|----------|----------|----------|
| 1    | 26.1565 | 1   | 151.3739 | 1        | 77.89565 |
| 2    | 24.5043 | 2   | 154.3304 | 2        | 78.50435 |
| 3    | 22.2435 | 3   | 147.4609 | 3        | 83.89565 |
| 4    | 22.7652 | 4   | 169.7217 | 4        | 73.89565 |
